# Supplementary material for: A Comparative Study of the Effectiveness of Pharmacopuncture Therapy for Chronic Neck Pain: A Pragmatic, Randomized, Controlled Trial
Source: MDPI journal article supplement (doi:10.3390/jcm11010012), 2021-12-21
Supplement: s1 [file s1]

**Table S1.** Schedule of the participants.

| Time point (week)                                                                             | Screening              | Enroll-<br>ment allo-<br>cation | Active treatment after allo-<br>cation |     |     |     | Follow-up |     |     |
|-----------------------------------------------------------------------------------------------|------------------------|---------------------------------|----------------------------------------|-----|-----|-----|-----------|-----|-----|
|                                                                                               | -1                     | 0 (Base-<br>line)               | 1                                      | 2   | 3   | 4   | 5         | 8   | 12  |
| Visit window                                                                                  |                        | ± 3                             | ± 3                                    | ± 3 | ± 3 | ± 3 | ± 3       | ± 7 | ± 7 |
| Enrollment                                                                                    |                        |                                 |                                        |     |     |     |           |     |     |
| Eligibility screening                                                                         | ○                      | ○                               | –                                      | –   | –   | –   | –         | –   | –   |
| Written informed consent                                                                      | ○                      | –                               | –                                      | –   | –   | –   | –         | –   | –   |
| Vital signs                                                                                   | ○                      | ○                               | ○                                      | ○   | ○   | ○   | ○         | ○   | ○   |
| Sociodemographic characteristics, medical<br>history<br>(e.g., neck pain, medication history) | ○                      | –                               | –                                      | –   | –   | –   | –         | –   | –   |
| Cervical spine X-ray                                                                          | ○                      | –                               | –                                      | –   | –   | –   | –         | –   | –   |
| Randomized allocation                                                                         | –                      | ○                               | –                                      | –   | –   | –   | –         | –   | –   |
| Interventions                                                                                 |                        |                                 |                                        |     |     |     |           |     |     |
| Treatment for the pharmacopuncture<br>group<br>(experimental group)                           | ← 2 (1-3) times/week → |                                 |                                        |     |     |     |           |     |     |
| Treatment for the PT group<br>(control group)                                                 | ← 2 (1-3) times/week → |                                 |                                        |     |     |     |           |     |     |
| Assessments                                                                                   |                        |                                 |                                        |     |     |     |           |     |     |
| Symptoms and change                                                                           | –                      | –                               | ○                                      | ○   | ○   | ○   | ○         | ○   | ○   |
| NRS scores for neck and arm pain                                                              | –                      | –                               | ○                                      | ○   | ○   | ○   | ○         | ○   | ○   |
| VAS score for neck pain                                                                       | ○                      | ○                               | ○                                      | ○   | ○   | ○   | ○         | ○   | ○   |
| VAS score for arm pain                                                                        | –                      | –                               | ○                                      | ○   | ○   | ○   | ○         | ○   | ○   |
| NPQ                                                                                           | –                      | –                               | ○                                      | –   | –   | –   | ○         | ○   | ○   |
| NDI                                                                                           | –                      | –                               | ○                                      | –   | –   | –   | ○         | ○   | ○   |
| PGIC                                                                                          | –                      | –                               | –                                      | –   | –   | –   | ○         | ○   | ○   |
| SF-12                                                                                         | –                      | –                               | ○                                      | –   | –   | –   | ○         | ○   | ○   |
| EQ-5D-5L                                                                                      | –                      | –                               | ○                                      | –   | –   | –   | ○         | ○   | ○   |
| Physical examination                                                                          | –                      | –                               | ○                                      | –   | –   | –   | ○         | –   | –   |
| Drug use                                                                                      | ○                      | ○                               | ○                                      | ○   | ○   | ○   | ○         | ○   | ○   |
| Evaluation of medical costs                                                                   | –                      | –                               | ○                                      | –   | –   | –   | ○         | ○   | ○   |
| Evaluation of time cost                                                                       |                        |                                 |                                        | ○   |     |     |           |     |     |
| Evaluation of lost work productivity                                                          |                        |                                 | ○                                      | ○   | ○   | ○   | ○         | ○   | ○   |
| Credibility and expectancy                                                                    |                        |                                 | ○                                      |     |     |     |           |     |     |
| Blood analysis                                                                                |                        |                                 | ○                                      |     |     |     | ○         |     |     |
| Adverse events                                                                                |                        | ○                               | ← Every visit →                        |     |     |     | ○         | ○   | ○   |

*PT*, physical therapy; *NRS*, numeric rating scale; *VAS*, visual analogue scale; *NPQ*, Northwick Park Questionnaire; *NDI*, neck disability index; *PGIC*, patient global impression of change, *SF-12*, 12-Item Short Form Health Survey; *EQ-5D-5L*, EuroQoL 5-dimension 5-level instrument.

**Table S2.** List of treatments provided to the patients.

| Intervention                                | N (%)     | Mean $\pm$ SD |
|---------------------------------------------|-----------|---------------|
| <b>Pharmacopuncture group (n = 49)</b>      |           |               |
| Shinbaro 2                                  | 47 (95.9) | 8.4 $\pm$ 3.0 |
| Harpagophytum procumbens                    | 17 (34.7) | 7.2 $\pm$ 1.8 |
| Shinbaro 1                                  | 2 (4.1)   | 8 $\pm$ 0     |
| <b>Physical therapy group (n = 49)</b>      |           |               |
| Interferential current therapy              | 36 (73.5) | 7.4 $\pm$ 1.7 |
| Deep heat therapy                           | 31 (63.3) | 6.0 $\pm$ 3.2 |
| Superficial heat therapy                    | 13 (26.5) | 7.9 $\pm$ 0.3 |
| Laser therapy                               | 13 (26.5) | 6.4 $\pm$ 1   |
| Transcutaneous electrical nerve stimulation | 12 (24.5) | 6.5 $\pm$ 2.2 |
| Extracorporeal shock wave therapy           | 6 (12.2)  | 4.3 $\pm$ 2.4 |

The number (%) of patients in both groups who received each treatment are shown. Multiple uses were allowed. *SD*, standard deviation.

**Table S3.** Primary and secondary outcomes according to the per-protocol analysis .

|                                |                                 | Week 5               | Week 8               | Week 12              |
|--------------------------------|---------------------------------|----------------------|----------------------|----------------------|
| <b>VAS score for neck pain</b> | Pharmacopuncture (n = 47)       | 33.74 (28.49, 39.00) | 34.08 (20.48, 47.68) | 35 (15.12, 54.88)    |
|                                | PT (n = 46)                     | 17.85 (12.64, 23.06) | 21.73 (1.79, 41.68)  | 27.28 (3.46, 51.10)  |
|                                | Difference in decrease (95% CI) | 16.60 (9.73, 23.47)  | 13.16 (1.35, 24.97)  | 8.40 (-1.97, 18.78)  |
|                                | P-value                         | <.0001               | 0.029                | 0.112                |
| <b>VAS score for arm pain</b>  | Pharmacopuncture (n = 47)       | 18.19 (12.07, 24.32) | 18.55 (10.29, 26.8)  | 21.10 (13.18, 29.02) |
|                                | PT (n = 46)                     | 10.5 (4.31, 16.69)   | 10.83 (2.42, 19.23)  | 11.24 (1.92, 20.56)  |
|                                | Difference in decrease (95% CI) | 5.53 (-1.24, 12.30)  | 5.44 (-2.30, 13.18)  | 7.21 (-1.44, 15.86)  |
|                                | P-value                         | 0.108                | 0.168                | 0.102                |
| <b>NRS score for neck pain</b> | Pharmacopuncture (n = 47)       | 3.28 (2.75, 3.8)     | 3.26 (2.65, 3.86)    | 3.40 (2.82, 3.99)    |
|                                | PT (n = 46)                     | 1.70 (1.16, 2.23)    | 1.83 (1.29, 2.36)    | 2.22 (1.60, 2.83)    |
|                                | Difference in decrease (95% CI) | 1.68 (1.01, 2.35)    | 1.51 (0.75, 2.27)    | 1.27 (0.48, 2.06)    |
|                                | P-value                         | <.0001               | <.0001               | 0.002                |
| <b>NRS score for arm pain</b>  | Pharmacopuncture (n = 47)       | 1.66 (1.05, 2.27)    | 1.72 (1.03, 2.41)    | 2.04 (1.37, 2.71)    |
|                                | PT (n = 46)                     | 1.15 (0.57, 1.73)    | 1.21 (0.65, 1.77)    | 1.13 (0.28, 1.99)    |
|                                | Difference in decrease (95% CI) | 0.40 (-0.23, 1.03)   | 0.41 (-0.31, 1.13)   | 0.78 (-0.07, 1.64)   |
|                                | P-value                         | 0.212                | 0.263                | 0.071                |
| <b>NDI</b>                     | Pharmacopuncture (n = 47)       | 14.78 (11.39, 18.16) | 17.12 (13.13, 21.11) | 17.79 (13.63, 21.95) |
|                                | PT (n = 46)                     | 7.73 (5.06, 10.40)   | 9.78 (6.86, 12.71)   | 10.31 (6.99, 13.63)  |

|                    |                                 |                      |                      |                      |
|--------------------|---------------------------------|----------------------|----------------------|----------------------|
|                    | Difference in decrease (95% CI) | 5.35 (1.42, 9.27)    | 5.39 (0.88, 9.90)    | 5.50 (0.59, 10.41)   |
|                    | P-value                         | 0.008                | 0.019                | 0.029                |
| <b>NPQ</b>         | Pharmacopuncture (n = 47)       | 17.62 (14.08, 21.16) | 17.91 (13.48, 22.33) | 20.52 (16.37, 24.67) |
|                    | PT (n = 46)                     | 9.77 (6.72, 12.82)   | 11.31 (8.09, 14.52)  | 11.93 (8.17, 15.68)  |
|                    | Difference in decrease (95% CI) | 6.43 (2.16, 10.70)   | 4.89 (-0.08, 9.86)   | 7.04 (1.84, 12.25)   |
|                    | P-value                         | 0.004                | 0.054                | 0.009                |
| <b>EQ-5D-5L</b>    | Pharmacopuncture (n = 47)       | -0.10 (-0.14, -0.06) | -0.11 (-0.15, -0.07) | -0.14 (-0.18, -0.09) |
|                    | PT (n = 46)                     | -0.04 (-0.07, -0.01) | -0.04 (-0.07, -0.01) | -0.06 (-0.1, -0.03)  |
|                    | Difference in decrease (95% CI) | -0.01 (-0.05, 0.02)  | -0.01 (-0.04, 0.02)  | -0.02 (-0.06, 0.03)  |
|                    | P-value                         | 0.405                | 0.647                | 0.446                |
| <b>SF-12 (MCS)</b> | Pharmacopuncture (n = 47)       | -4.44 (-7.11, -1.77) | -4.21 (-7.57, -0.84) | -5.99 (-9.31, -2.66) |
|                    | PT (n = 46)                     | -4.41 (-7.34, -1.47) | -4.03 (-6.95, -1.12) | -4.72 (-7.6, -1.83)  |
|                    | Difference in decrease (95% CI) | 1.42 (-1.76, 4.59)   | 1.36 (-2.35, 5.06)   | 0.24 (-3.41, 3.90)   |
|                    | P-value                         | 0.379                | 0.473                | 0.895                |
| <b>SF-12 (PCS)</b> | Pharmacopuncture (n = 47)       | -5.53 (-8.03, -3.03) | -7.02 (-9.29, -4.76) | -7.23 (-9.62, -4.83) |
|                    | PT (n = 46)                     | -1.84 (-4.12, 0.44)  | -2.81 (-5.14, -0.48) | -2.98 (-5.40, -0.55) |
|                    | Difference in decrease (95% CI) | -2.59 (-5.41, 0.24)  | -3.10 (-5.76, -0.44) | -3.08 (-5.84, -0.32) |
|                    | P-value                         | 0.072                | 0.023                | 0.029                |
| <b>PGIC</b>        | Pharmacopuncture (n = 47)       | 2.36 (2.17, 2.55)    | 2.51 (2.25, 2.77)    | 2.34 (2.11, 2.57)    |
|                    | PT (n = 46)                     | 3.11 (2.90, 3.32)    | 3.16 (-3.04, 9.36)   | 3.17 (2.93, 3.42)    |
|                    | Difference in decrease (95% CI) | -0.75 (-1.02, -0.47) | -0.65 (-1.03, -0.27) | -0.83 (-1.17, -0.5)  |
|                    | P-value                         | <.0001               | 0.001                | <.0001               |

Effectiveness outcomes were assessed as the decrease from the baseline levels. Between-group differences were analyzed through an analysis of covariance with adjustment for the baseline values except patient global impression of change. The primary endpoint was week 5. Missing values were added through multiple imputation. Estimates for each group and between-group differences in the decrease at each time point are displayed with the 95% confidence intervals (CIs). *PT*, physical therapy; *CI*, confidence interval; *VAS*, visual analogue scale; *NRS*, numeric rating scale; *NDI*, neck disability index; *NPQ*, Northwick Park Questionnaire; *SF-12*, 12-Item Short Form Health Survey; *EQ-5D-5L*, EuroQoL 5-dimension 5-level instrument; *MCS*, mental component summary; *PCS*, physical component summary; *PGIC*, patient global impression of change. The VAS, NRS, EQ-5D-5L, SF-12, and PGIC were measured as scores. The NDI and NPQ were calculated as percentages. The PGIC was assessed using a scale from 1 (improved) to 7 (worsened), with a lower score indicating more improvement. Between-group differences were analyzed by performing an independent t-test of the endpoint values.

**Table S4.** Analysis of between-group differences with the linear mixed model.

|                         | Week 2              | Week 3               | Week 4               | Week 5               | Week 8               | Week 12              |
|-------------------------|---------------------|----------------------|----------------------|----------------------|----------------------|----------------------|
| VAS score for neck pain |                     |                      |                      |                      |                      |                      |
| Pharmacopuncture*       | 8.64 (5.30, 11.98)  | 17.38 (12.87, 21.89) | 27.04 (22.00, 32.08) | 33.73 (28.59, 38.87) | 34.51 (27.27, 41.75) | 35.44 (29.25, 41.64) |
| PT*                     | 5.04 (2.85, 7.24)   | 8.79 (6.04, 11.54)   | 12.08 (8.50, 15.67)  | 17.10 (12.01, 22.20) | 19.80 (13.19, 26.41) | 24.48 (16.76, 32.21) |
| Group*visit             | 3.45 (-0.5, 7.41)   | 8.32 (3.14, 13.5)    | 14.5 (8.45, 20.55)   | 16.33 (9.2, 23.46)   | 15.49 (6.88, 24.11)  | 11.23 (2.92, 19.55)  |
| P-value                 | 0.0864              | 0.0019               | <.0001               | <.0001               | 0.0006               | 0.0086               |
| VAS score for arm pain  |                     |                      |                      |                      |                      |                      |
| Pharmacopuncture*       | 2.74 (-1.94, 7.43)  | 9.64 (4.73, 14.55)   | 13.47 (8.65, 18.29)  | 18.65 (12.58, 24.71) | 18.80 (11.07, 26.54) | 22.44 (14.65, 30.24) |
| PT*                     | 2.85 (-1.42, 7.11)  | 3.36 (-0.85, 7.57)   | 8.52 (3.90, 13.15)   | 10.42 (4.45, 16.38)  | 13.77 (7.92, 19.63)  | 15.55 (6.41, 24.68)  |
| Group*visit             | 0.18 (-5.99, 6.35)  | 6.33 (0.06, 12.59)   | 5.06 (-1.43, 11.55)  | 8.47 (0.14, 16.8)    | 9.82 (0.59, 19.06)   | 8.97 (-1.19, 19.12)  |
| P-value                 | 0.9543              | 0.0477               | 0.1251               | 0.0464               | 0.0373               | 0.0828               |
| NRS score for neck pain |                     |                      |                      |                      |                      |                      |
| Pharmacopuncture*       | 0.74 (0.40, 1.09)   | 1.55 (1.09, 2.02)    | 2.66 (2.16, 3.16)    | 3.29 (2.78, 3.81)    | 3.29 (2.70, 3.88)    | 3.42 (2.85, 3.99)    |
| PT*                     | 0.57 (0.29, 0.84)   | 0.87 (0.58, 1.16)    | 1.29 (0.90, 1.68)    | 1.67 (1.15, 2.18)    | 1.81 (1.30, 2.32)    | 2.19 (1.59, 2.78)    |
| Group*visit             | 0.17 (-0.26, 0.6)   | 0.68 (0.14, 1.22)    | 1.36 (0.74, 1.97)    | 1.60 (0.88, 2.32)    | 1.48 (0.72, 2.24)    | 1.21 (0.39, 2.02)    |
| P-value                 | 0.4325              | 0.0135               | <.0001               | <.0001               | 0.0002               | 0.004                |
| NRS of arm pain         |                     |                      |                      |                      |                      |                      |
| Pharmacopuncture*       | 0.13 (-0.31, 0.57)  | 0.74 (0.30, 1.19)    | 1.17 (0.70, 1.64)    | 1.69 (1.09, 2.28)    | 1.77 (1.09, 2.45)    | 2.08 (1.42, 2.74)    |
| PT*                     | 0.35 (-0.09, 0.79)  | 0.47 (0.08, 0.86)    | 1.04 (0.59, 1.49)    | 1.17 (0.61, 1.72)    | 1.38 (0.86, 1.91)    | 1.19 (0.36, 2.01)    |
| Group*visit             | -0.22 (-0.82, 0.38) | 0.31 (-0.27, 0.88)   | 0.16 (-0.47, 0.8)    | 0.55 (-0.25, 1.35)   | 0.60 (-0.32, 1.51)   | 0.93 (-0.11, 1.96)   |
| P-value                 | 0.4692              | 0.2924               | 0.6132               | 0.1776               | 0.1983               | 0.0778               |
| NDI                     |                     |                      |                      |                      |                      |                      |
| Pharmacopuncture*       |                     |                      |                      | 14.88 (11.56, 18.20) | 17.18 (13.27, 21.09) | 17.75 (13.68, 21.83) |
| PT*                     |                     |                      |                      | 7.95 (5.34, 10.56)   | 10.07 (7.45, 12.69)  | 10.55 (7.34, 13.75)  |
| Group*visit             |                     |                      |                      | 6.72 (2.56, 10.88)   | 6.94 (2.33, 11.56)   | 6.96 (1.85, 12.06)   |

|                   |         |                      |                      |                      |
|-------------------|---------|----------------------|----------------------|----------------------|
|                   | P-value | 0.0018               | 0.0036               | 0.0081               |
| NPQ               |         |                      |                      |                      |
| Pharmacopuncture* |         | 17.66 (14.19, 21.12) | 18.11 (13.76, 22.46) | 20.49 (16.43, 24.55) |
| PT*               |         | 9.88 (6.93, 12.84)   | 11.47 (8.45, 14.50)  | 12.18 (8.56, 15.80)  |
| Group*visit       |         | 7.45 (2.95, 11.95)   | 6.43 (1.2, 11.66)    | 7.96 (2.58, 13.34)   |
|                   | P-value | 0.0014               | 0.0165               | 0.0041               |
| EQ-5D-5L          |         |                      |                      |                      |
| Pharmacopuncture* |         | -0.10 (-0.13, -0.06) | -0.11 (-0.15, -0.07) | -0.13 (-0.18, -0.09) |
| PT*               |         | -0.04 (-0.06, -0.01) | -0.04 (-0.08, -0.01) | -0.06 (-0.10, -0.03) |
| Group*visit       |         | -0.06 (-0.11, -0.02) | -0.07 (-0.12, -0.02) | -0.07 (-0.12, -0.02) |
|                   | P-value | 0.0053               | 0.0075               | 0.011                |
| SF-12 (MCS)       |         |                      |                      |                      |
| Pharmacopuncture* |         | -4.36 (-6.98, -1.74) | -4.09 (-7.39, -0.79) | -5.74 (-9.03, -2.46) |
| PT*               |         | -4.45 (-7.28, -1.62) | -4.50 (-7.43, -1.56) | -4.98 (-7.77, -2.19) |
| Group*visit       |         | 0.07 (-3.71, 3.86)   | 0.33 (-3.99, 4.64)   | -0.78 (-5.01, 3.45)  |
|                   | P-value | 0.9699               | 0.8803               | 0.7153               |
| SF-12 (PCS)       |         |                      |                      |                      |
| Pharmacopuncture* |         | -5.58 (-8.03, -3.13) | -7.00 (-9.22, -4.79) | -7.30 (-9.65, -4.96) |
| PT*               |         | -1.72 (-3.92, 0.48)  | -2.59 (-4.82, -0.36) | -2.82 (-5.15, -0.49) |
| Group*visit       |         | -3.73 (-6.97, -0.5)  | -4.39 (-7.46, -1.31) | -4.34 (-7.6, -1.09)  |
|                   | P-value | 0.0242               | 0.0056               | 0.0094               |

---

The estimates for each group and between-group differences in the pain decrease at each time point are displayed with the 95% confidence intervals (CIs). *PT*, physical therapy; *VAS*, visual analogue scale; *NRS*, numeric rating scale; *NDI*, neck disability index; *NPQ*, Northwick Park Questionnaire; *SF-12*, 12-Item Short Form Health Survey; *EQ-5D-5L*, EuroQoL 5 dimension 5-level instrument; *MCS*, mental component summary; *PCS*, physical component summary; *PGIC*, patient global impression of change.

**Table S5.** Summary of treatment-related adverse events.

|                                                 | <b>Pharmacopuncture</b> | <b>Physical therapy</b> |
|-------------------------------------------------|-------------------------|-------------------------|
| Treatment-related adverse events                | 2                       | 0                       |
| Gastrointestinal disorders                      | 0                       | 0                       |
| Musculoskeletal and connective tissue disorders | 0                       | 0                       |
| Nervous system disorders                        | 0                       | 0                       |
| Symptom-related skin disorders                  | 2                       | 0                       |
| Serious adverse events                          | 0                       | 0                       |
| Severity                                        |                         |                         |
| Mild                                            | 2                       | 0                       |
| Moderate                                        | 0                       | 0                       |
| Severe                                          | 0                       | 0                       |
